# Supplementary material
Source: Springer Nature journal article supplement (https://www.springermedizin.de/resource/supplementary/12943_2013_1476_MOESM1_ESM.pdf/9552932)

## A. RT-CES

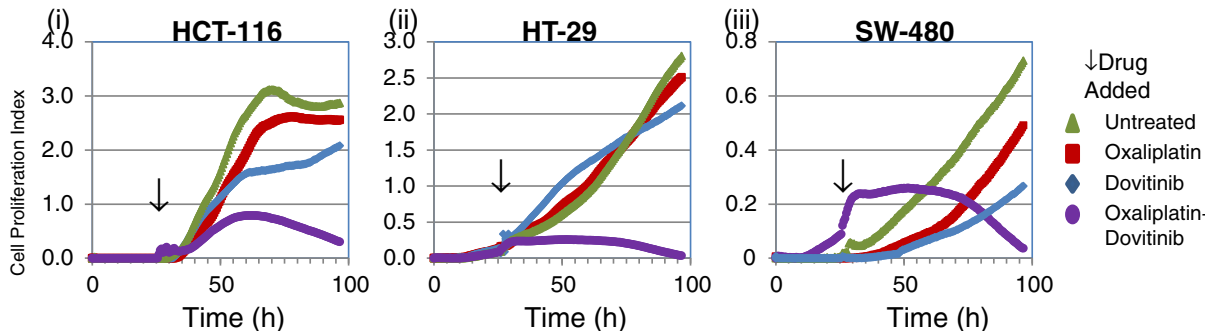

## B. MTS assay

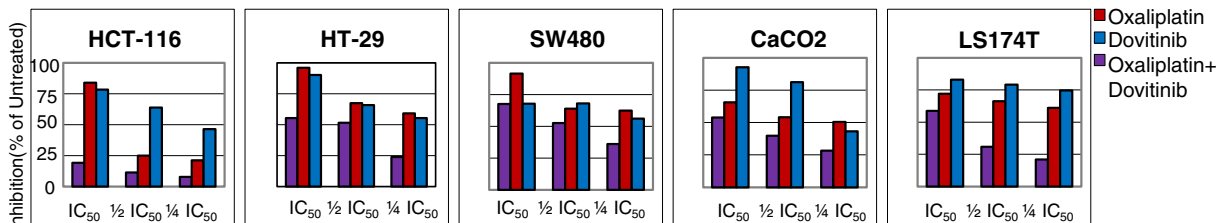

## C. Combination Indices (CI)

| Cell Lines                       | HCT-116     | HT-29     | SW480       | CaCO2     | LS174T      |
|----------------------------------|-------------|-----------|-------------|-----------|-------------|
|                                  | Combination |           | Combination |           | Combination |
| <b>Oxaliplatin and Dovitinib</b> | 0.20 0.12   | 0.47 0.20 | 0.48 0.11   | 0.47 0.13 | 0.07 0.03   |

0.1-0.3 Strong Synergism

0.9-1.1 Additive

>1.5 Strong Antagonism

0.3-0.7 Synergism

1.1-1.2 Slight antagonism

0.7-0.9 Slight Synergism

1.2-1.5 Antagonism

## D. Wound Healing Assay

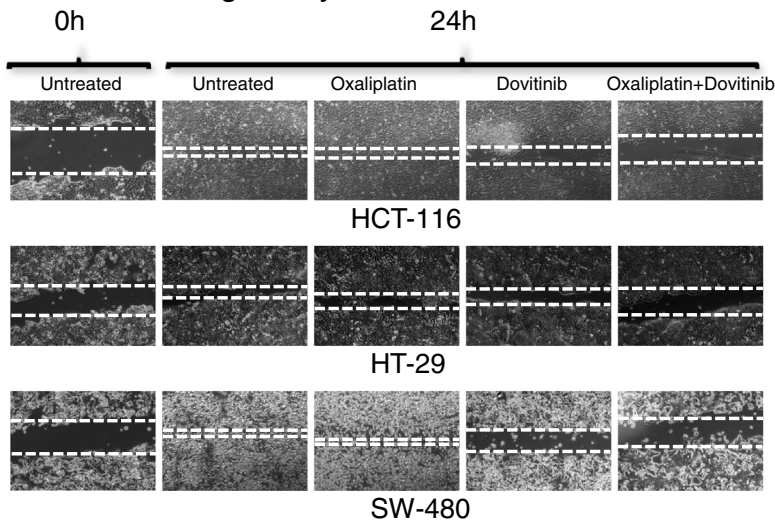

## E. Wound Width

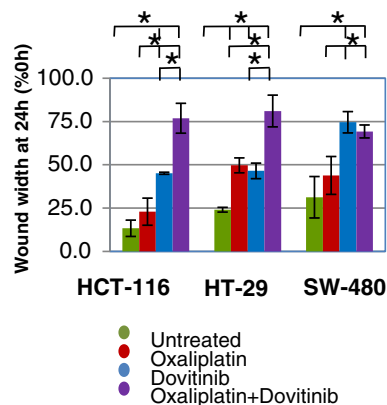

Supplement: MOESM1 [file 9552932]
